# Supplementary material for: First-principles studies on facet-dependent photocatalytic properties of bismuth oxyhalides (BiOXs)
Source: Royal Society of Chemistry journal article supplement (doi:10.1039/c2ra20881d), 2012-01-01
Supplement: c2ra20881d.pdf [file c2ra20881d.pdf]

Electronic Supplementary Information (ESI)

## **First-Principles Studies on Facet-Dependent Photocatalytic Properties of Bismuth Oxyhalides (BiOXs)**

Haijun Zhang,<sup>a,c</sup> Lu Liu<sup>\*:a</sup> and Zhen Zhou<sup>\*:b</sup>

*<sup>a</sup>Tianjin Key Laboratory of Environmental Remediation and Pollution Control, Nankai University, Tianjin 300071, P. R. China.*

*<sup>b</sup>Key Laboratory of Advanced Energy Materials Chemistry (Ministry of Education), Institute of New Energy Material Chemistry, and Computational Centre for Molecular Science, Nankai University, Tianjin 300071, P. R. China.*

*<sup>c</sup>School of Physics and Materials Science, Anhui University, Hefei 230039, P. R. China.*

\* Corresponding author. Email: [liul@nankai.edu.cn](mailto:liul@nankai.edu.cn) (LL) or [zhouzhen@nankai.edu.cn](mailto:zhouzhen@nankai.edu.cn) (ZZ)

**Table S1.** Bi-O/Bi-X Bonds Lengths for Different BiOX Structures (in Å).

| Terminations | BiOF        | BiOCl       | BiOBr       | BiOI        |
|--------------|-------------|-------------|-------------|-------------|
| Bulk         | 2.298/3.498 | 2.333/3.945 | 2.343/4.127 | 2.362/4.303 |
| {001}-1X     | Surface     | 2.300/3.423 | 2.334/3.957 | 2.347/4.130 |
|              | Central     | 2.298/3.498 | 2.333/3.950 | 2.344/4.133 |
| {001}-2X     | Surface     | 2.340/3.191 | 2.345/3.890 | 2.344/4.137 |
|              | Central     | 2.291/3.490 | 2.333/3.948 | 2.344/4.113 |
| {001}-BiO    | Surface     | 2.327/3.605 | 2.355/3.849 | 2.311/4.093 |
|              | Central     | 2.291/3.490 | 2.333/3.949 | 2.345/4.113 |
| {110}-O      | Surface     | 2.204/3.588 | 2.185/3.849 | 2.157/4.096 |
|              | Central     | 2.291/3.490 | 2.333/3.948 | 2.344/4.113 |
| {110}-BiX    | Surface     | 2.253/3.588 | 2.276/3.719 | 2.290/3.826 |
|              | Central     | 2.291/3.490 | 2.333/3.948 | 2.344/4.113 |
| {010}        | Surface     | 2.282/3.468 | 2.296/3.847 | 2.294/3.889 |
|              | Central     | 2.301/3.586 | 2.319/3.945 | 2.339/4.109 |
